# 1 **Endogenous feline leukemia virus siRNA transcription may interfere with exogenous FeLV** 2 **infection**

3

## 4 **Running title: FeLV interference via enFeLV-produced RNA**

5

6 **Elliott S. Chiu<sup>1</sup> and Sue VandeWoude<sup>1#</sup>**

7 <sup>1</sup>Department of Microbiology, Immunology, and Pathology; Colorado State University; Fort Collins, CO

8 80523; USA

9 #Correspondence: Sue.vandewoude@colostate.edu

10

### 11 **Keywords**

12 RNAi, siRNA, feline leukemia virus, LTR, viral restriction, endogenous retrovirus

13

### 14 **Abstract**

15 Endogenous retroviruses (ERVs) are increasingly recognized for biological impacts on host cell function  
16 and susceptibility to infectious agents, particularly in relation to interactions with exogenous retroviral  
17 progenitors (XRVs). ERVs can simultaneously promote and restrict XRV infections using different  
18 mechanisms that are virus- and host-specific. The majority of endogenous-exogenous retroviral  
19 interactions have been evaluated in experimental mouse or chicken systems which are limited in their  
20 ability to extend findings to naturally infected outbred animals. Feline leukemia virus (FeLV) has a  
21 relatively well-characterized endogenous retrovirus with a coexisting virulent exogenous counterpart  
22 and is endemic worldwide in domestic cats. We have previously documented an association between  
23 endogenous FeLV LTR copy number and abrogated exogenous FeLV in naturally infected cats and  
24 experimental infections in tissue culture. Analyses described here examine limited FeLV replication in  
25 experimentally infected peripheral blood mononuclear cells. We further examine NCBI Sequence Read

26 Archive RNA transcripts to evaluate enFeLV transcripts and RNA interference precursors. We find that  
27 lymphoid-derived tissues, which are experimentally less permissive to exogenous FeLV infection,  
28 transcribe higher levels of enFeLV under basal conditions. Transcription of enFeLV-LTR segments is  
29 significantly greater than other enFeLV genes. We documented transcription of a 21-nt miRNA just 3' to  
30 the enFeLV 5'-LTR in the feline miRNAome of all datasets evaluated (n=27). Our findings point to  
31 important biological functions of enFeLV transcription linked to solo LTRs distributed within the  
32 domestic cat genome, with potential impacts on domestic cat exogenous FeLV susceptibility and  
33 pathogenesis.

34

### 35 **Importance**

36 Endogenous retroviruses (ERVs) are increasingly implicated in host cellular processes and susceptibility  
37 to infectious agents, specifically regarding interactions with exogenous retroviral progenitors (XRVs).  
38 Exogenous feline leukemia virus (FeLV) and its endogenous counterpart (enFeLV) represent a well  
39 characterized, naturally occurring XRV-ERV dyad. We have previously documented an abrogated FeLV  
40 infection in both naturally infected cats and experimental fibroblast infections that harbor higher enFeLV  
41 proviral loads. Using an *in silico* approach, we provide evidence of miRNA-transcription that are  
42 produced in tissues most important for FeLV infection, replication, and transmission. Our findings point  
43 to important biological functions of enFeLV transcription linked to solo-LTRs distributed within the feline  
44 genome, with potential impacts on domestic cat exogenous FeLV susceptibility and pathogenesis. This  
45 body of work provides additional evidence of RNAi as a mechanism of viral interference and is a  
46 demonstration of ERV exaptation by the host to defend against related XRVs.

47

### 48 **Introduction**

49 Endogenous retroviruses (ERV) are scattered throughout vertebrate genomes, representing 8% of  
50 genomic content, with documented impacts on normal biologic processes (Consortium, 2001; Griffiths,

51 2001). During early stages of endogenization, ERVs accumulate mutations that often render the newly  
52 endogenized virus defunct, protecting hosts from potentially deleterious genetic material (Lober et al.,  
53 2018). In addition to accumulating mutations, ERVs can act as retro-transposable elements inserting into  
54 novel genomic loci. Because ERVs are initiated by intact retroviruses with palindromic long terminal  
55 repeat (LTR) flanking sequences, they can be edited from the genome via homologous recombination and  
56 other mechanisms that are incompletely understood. Sometimes this process results in remnant genomic  
57 segments in the form of solo LTRs (Boeke and Stoye, 1997; Lober et al., 2018). While usually unable to  
58 produce infectious virions, many ERVs are still capable of undergoing transcription and may produce  
59 functional viral proteins (Knerr et al., 2004; Li and Karlsson, 2016). ERVs also function to enhance and/or  
60 promote transcription of proximal host genes. Following fixation in the genome, consequently, ERVs have  
61 been usurped by vertebrate hosts for essential biological processes such as placentation, oncogenesis,  
62 immune modulation, and infectious disease progression (Crittenden et al., 1987; Knerr et al., 2004;  
63 Umemura et al., 2000; Zeng et al., 2014).

64 ERVs have also been exapted to participate in anti-viral activities against exogenous homologues.  
65 Endogenous mouse mammary tumor virus (MMTV)-encoded superantigen negatively selects against self-  
66 reacting T-cells, limiting the ability for certain exogenous MMTV strains to infect those T-cells (Holt et al.,  
67 2013). Endogenous jaagsiekte sheep retrovirus (JSRV) produces Gag-like proteins that interfere with the  
68 regular trafficking mechanisms of exogenous JSRV, thereby reducing viral budding and maturation  
69 (Malfavon-Borja et al., 2015). Likewise, endogenous JSRV inhibits cell entry of JSRV through  
70 hyaluronidase-2 receptor interference by saturating and ultimately limiting the number of receptors that  
71 are displayed on the cell surface (Spencer et al., 2003).

72 FeLV endogenization has occurred in Felidae of the *Felis* genus, and has been characterized in the  
73 domestic cat (*Felis catus*). Eight to twelve nearly full-length enFeLV genomes are present in each genome,  
74 with significantly greater numbers of solo LTR remnants (Chiu and VandeWoude, 2020; Powers et al.,  
75 2018; Roca et al., 2005). Full-length enFeLV genomes are 86% similar at the nucleotide level to

76 horizontally transmitted exogenous FeLV (exFeLV) (Chiu et al., 2018). Domestic cat exFeLV infects  
77 domestic cats across the globe with an incidence that ranges from 3-18% (Bandedecchi et al., 1992; Gleich  
78 et al., 2009; Muirden, 2002; Yilmaz and Ilgaz, 2000). exFeLV infection has a variety of clinical outcomes,  
79 with approximately 60% of infections resulting in aborted or truncated infection, and the remainder  
80 progressing to high levels of viremia resulting in hematologic dyscrasias, cancers, opportunistic  
81 infections and death (Hartmann, 2011). In a study of a natural FeLV epizootic in a 65-hybrid domestic cat  
82 breeding colony, we demonstrated a correlation between higher enFeLV-LTR copy number and cats with  
83 regressive or abortive FeLV clinical outcomes. This finding was in contrast to cats with lower LTR copy  
84 number, which developed progressive infection and accumulated virulent enFeLV-exogenous FeLV  
85 recombinants (Powers et al., 2018). We experimentally infected domestic cat fibroblasts with FeLV and  
86 likewise demonstrated that primary cells from cats with greater enFeLV-LTR copy number were more  
87 resistant to FeLV infection and viral replication (Chiu and VandeWoude, 2020). This relationship was not  
88 observed when we examined FeLV infection and replication related to enFeLV-*env* gene copy number,  
89 representing intact full enFeLV genomes, which were found at considerably lower rate of incorporation  
90 than enFeLV-LTR (mean of 11 *env* copies/cell versus 57 LTR copies/cell) (Chiu and VandeWoude, 2020).

91 Cell culture experiments further illustrated highly significant dose-dependent correlation between  
92 enFeLV-LTR copy number and viral antigen production, prompting the hypothesis that enFeLV may  
93 directly interfere with exogenous FeLV (13). One potential mechanism for direct interference is  
94 transcription of enFeLV small non-coding RNAs that regulate gene expression and viral reproduction by  
95 degrading target RNA. siRNA, miRNA, and piRNA result in RNA interference (RNAi) via different  
96 mechanisms. siRNA and miRNA activate the ribonuclease DICER which processes siRNA and miRNA and  
97 incorporates them into RNA-induced silencing complex (RISC) which targets complementary mRNA for  
98 degradation (Pratt and MacRae, 2009). Once incorporated into a RISC complex, ssRNA can find its full  
99 (siRNA) or partial (miRNA) complementary mRNA strand and signal it for translational repression,  
100 mRNA degradation, or mRNA cleavage. A comprehensive review of siRNA and miRNA can be found in

(Lam et al., 2015). piRNAs, on the other hand, are typically longer in length compared to siRNA (21-35 nt), which regulate gene expression and fight viral infection using a different mechanism (PIWI-clade Argonautes versus AGO-clade proteins) (Ozata et al., 2019) have been recently demonstrated to contribute to interruption of XRV processes in a newly endogenizing koala retrovirus (KoRV) (Yu et al., 2019). While RNAi is typically considered a potent antiviral mechanism used by plants and invertebrates, there have been evidence that RNAi is also used in mammalian systems to complement their normal antiviral activities governed by first-line interferon responses (Schuster et al., 2019). siRNA has been used to inhibit influenza RNA transcription in chicken embryos and canine cells (Ge et al., 2003). siRNAs have also been demonstrated to be capable of silencing hepatitis A viral infections in non-human primate and human cells (Kusov et al., 2006). Evidence is mounting that miRNA and siRNAs play a role in both promoting and inhibiting HIV replication (Balasubramaniam et al., 2018). As a result, there has been growing interest in research on RNAi as a mechanism of antiviral restriction in humans and other mammals.

To determine mechanisms underlying ERV-XRV interactions in the FeLV system, we used *in silico* approaches to investigate enFeLV transcripts in domestic cat tissues, evaluate transcript abundance and tissue tropism, and assess nature of small RNAs that may function to suppress exFeLV infection. Further, we assessed susceptibility of domestic cat peripheral blood mononuclear cells (PBMC) to examine exFeLV infection compared to fibroblasts. We conclude that enFeLV is transcriptionally active in healthy domestic cats and document significant basal levels of enFeLV siRNA transcription that is tissue specific. enFeLV mRNA and siRNA transcription levels were significantly higher in PBMC in other cells, and we noted significant exFeLV replication restriction in primary PBMC compared to fibroblasts. Our findings provide evidence that enFeLV-LTRs are likely to exert control of FeLV replication via an RNA interference mechanism. We also identified ERV transcripts in domestic cats as well as bobcat (*Lynx rufus*) and Siberian tiger (*Panthera tigris*), indicting transcription of this locus may be linked to an ancient pan-felid retroviral *pol* remnant with anti-retroviral or other functions.

126

127

## 128 **Results**

129 *PBMCs are less permissive to FeLV infection than fibroblasts*

130 Domestic cat PBMCs derived from six cats and challenged with FeLV attained much lower proviral  
131 load levels in culture than domestic cat fibroblast infections (Mann-Whitney U test,  $p=0.0022$ ; Fig. 2A). At  
132 day 5 post-inoculation, the mean proviral load achieved was 7,346 proviral copies of FeLV per million  
133 PBMC (range = 958-19,901 proviral copies/million) and only two samples exceeded OD thresholds for  
134 positive antigen detection (Fig. 2B). In comparison, fibroblast infections yielded a mean of 262,263  
135 (range = 19,376-1,851,261) proviral copy numbers/million cells on day 5 (Fig. 2A), and CrFK infections  
136 resulted in high levels of antigen production compared to PBMC (Fig. 2B).

137

138 *SRA accessed transcriptome data indicates tissue-specific enFeLV transcription and dominance of LTR*  
139 *transcription*

140 A total of 207 individual animal transcriptomic RNA-Seq datasets were retrieved from the SRA  
141 dataset inquiry. Fifty-six of these datasets were from healthy domestic cat tissues of various origins (e.g.,  
142 embryonic, lymphoid, neural, etc.). Forty-two datasets were included following quality control analysis,  
143 representing two studies (99 Lives Cat Genome Sequencing Initiative, *unpublished*) (Fig. 1)(Fushan et al.,  
144 2015). An RNA-seq datasets originating from a jaguar (*Panthera onca*) and one from a bobcat (*Lynx rufus*)  
145 were used as negative controls (Table S1).

146 enFeLV transcript levels were approximately 100 reads normalized per million reads (RPM) for  
147 most tissues. Outliers included: (1) embryonic tissues (*i.e.* head, body, whole), (2) lymphoid tissues, and  
148 (3) a single salivary gland sample. All of these tissues had consistently greater enFeLV transcription  
149 levels than neural, skin, reproductive, urinary, lung, digestive, circulatory, and liver tissues (Fig. 3A).

150 Lymphoid (n=4) and salivary gland (n=1) tissues had the greatest enFeLV transcription, averaging  
151 approximately 10-fold greater transcription than other tissues.

152 Following normalization against gene fragment length, enFeLV gene segments were found to have  
153 differential expression profiles (Fig. 3B). LTR, *gag*, *pol*, and *env* transcripts represented 0.439, 0.0302,  
154 0.0265, and 0.0453 FPKM of total transcripts, respectively. Relative expression of size-normalized gene  
155 segments as FPKM by tissue supports trends identified for full enFeLV; i.e. lymphoid tissues and salivary  
156 gland account for the greatest level of transcription (Fig. 4), and LTR transcription is approximately 10-  
157 fold greater than other enFeLV genes (Fig. 4A).

### 158 *enFeLV-like RNAs detected in multiple species represent a distinct ERV of felids*

159 RNA datasets from bobcat and Siberian tiger were analyzed as negative controls as these species  
160 do not have enFeLV present in their genomes (Polani et al., 2010). We identified two regions that mapped  
161 to the enFeLV genome (Fig. 5). One region was found in both bobcat and tiger with short RNA matches  
162 driven by a 29-nt poly-adenine stretch in the enFeLV 5' LTR. The second region varied between bobcat  
163 and tiger but both transcripts mapped to an 87-nt region in enFeLV *pol* in the endonuclease/integrase  
164 segment of the genome. The tiger transcript was 187-nt and contained 43 SNPs relative to the 87-nt  
165 corresponding region of enFeLV *pol*. The bobcat sequence was 179-nt long and contained 39 SNPs  
166 relative to enFeLV *pol*. Interestingly, an identical 87-nt region with 100% identity was noted in  
167 uncharacterized *Panthera pardus* (Leopard) LOC10927796 mRNA (Accession number: XM\_019467717)  
168 which was previously reported to represent an ERV (Wei et al., 2011). NCBI's BLAST tblastn function  
169 revealed a shared polymerase gene identity from this region of enFeLV *pol* to feline endogenous  
170 retrovirus gamma4-A1 (Accession number: LC176795). Nucleotide similarity between a 90nt region of  
171 LC176795 and enFeLV was 60% with 36 SNPs. Pairwise identity between full-length enFeLV (AY364319)  
172 and feline endogenous retrovirus LC176795 was 49%.

175 *SRA accessed miRNAome data identifies abundant enFeLV-derived siRNA transcripts that are both positive*  
176 *and negative sense*

177 Twenty-seven datasets were used to characterize the feline miRNAome from individual animal  
178 transcriptomic RNA-Seq datasets retrieved from the SRA (Table S2). These consisted of RNA fragments  
179 <30nt and corresponding to RNAs considered to function as RNA silencing transcripts (Lagana et al.,  
180 2017). enFeLV miRNA sequences accounted for 0.0163% of all miRNA in the annotated SRA pool.  
181 Approximately 75% of the miRNA sequences mapping to enFeLV originate from the LTR (75.1% ±  
182 21.0%), though *gag*, *pol*, and *env* represented more than 10% of the enFeLV-mapped reads in 3-6 of the  
183 27 datasets (Fig. 6, Fig. 7A).

184 Characterization of abundant miRNAs: A 21-nt LTR negative-sense miRNA at nucleotide 557 was  
185 detected in all 27 individuals and by far the most abundant enFeLV miRNA identified. This transcript is  
186 located just 3' to the 5'-LTR, 74 nucleotides downstream of the transcription start site (Fig. 7A). Sequence  
187 for this LTR miRNA, (5'- ATCCCGGACGAGCCCCACGC-3'), is identical to enFeLV in the same location, with  
188 the exception of the 3 flanking nucleotides, and represents a purely negative-stranded population (Fig.  
189 7B,E,H; Fig. S1). The 3 mismatched nucleotides have the lowest sequencing quality score, indicating these  
190 are potentially miscalled bases. A 12-nt miRNA segment (5'-TATCTAGCTTA-3') was identified in *env* at  
191 nucleotide 7,045 in 6 of 22 individuals (Fig. 7A). This sequence is positive-stranded and correlates with  
192 the gp70 surface protein-like portion of enFeLV Env. Six individuals also had a 14-nt miRNA (5'-  
193 CTCCGCGGCGCTGC-3') at nucleotide 1,963 within the virion core peptide p27 portion of enFeLV *gag* (Fig.  
194 7A). Three individuals also had miRNA segments that mapped diffusely around the  
195 endonuclease/integrase region of *pol* (nucleotide region 4800-5200) (Fig. 7A)

196 sRNApipe miRNA strand polarity analysis was used to analyze strand specificity for miRNA  
197 transcription for both abundant and rare miRNA transcripts that exceeded 18-nt in length. Many low  
198 copy number miRNA transcripts were found with homology to enFeLV in addition to the primary  
199 transcripts noted above. These were generally dispersed across the enFeLV genome. Three



representative datasets (Accession numbers: SRR4243126, SRR4243130, SRR4243132) that illustrate unique miRNA transcripts are depicted in Fig. 7B-J, and remaining maps are included in Fig. S1. As noted above, the abundant 21-nt 5' LTR transcript found in all individuals was a negative-sense transcript, while reads mapping to other regions of the genome were overwhelmingly positive-stranded (Fig. 7B-D, Fig. S1). A unique 20-nt read that was exclusively positive-sense mapped to enFeLV *env* with one deletion and two SNPs in the intervening sequence. miRNA mapping to *pol* is non-specific to a specific locus and has both positive-sense and negative-sense strands mapping to the area.

## Discussion

Despite decades of study, the mechanisms underlying the distinct outcomes of domestic cat FeLV infection remain elusive. The majority of FeLV-infected cats overcome infection, and vaccination can successfully protect against disease, suggesting an adaptive immune response can be protective (Torres et al., 2005). However, a significant proportion of animals exposed to FeLV are unable to eliminate the infection and ultimately succumb to hematologic dyscrasias, lymphoid tumors, or opportunistic infections (Cotter et al., 1975). FeLV replicates to extraordinarily high titers during progressive infection, and in more than 50% of progressive infections, ERV-EXV recombination occurs, resulting in switch in receptor usage and more progressive disease (Powers et al., 2018). Novel observations reported here are highly suggestive that domestic cat enFeLV functions in part to restrict exFeLV infection and provides an explanation for divergent outcomes of FeLV disease.

*In silico* analysis demonstrates that basal enFeLV transcripts are abundant in tissues from healthy cats, enFeLV is transcribed in a tissue-specific manner, and transcript level varies by gene segment (Fig. 3B and 4). LTR transcription is approximately 10 times higher than *pol*, *gag* and *env* (Fig. 4), which may be reflective of the greater number of LTR elements per genome than other segments (Chiu and VandeWoude, 2020). Lymphoid tissue transcription is 1-2 logs greater transcription than other tissues, and one salivary gland transcriptome available for analysis had higher expression than lymphoid (Fig. 4).

225 miRNA transcripts mapping to enFeLV were also detected, including a 21-nt negative-stranded  
226 oligoribonucleotide noted in 27 of 27 miRNA transcriptomes in the SRA database (Fig. 7; Fig. S1). FeLV is  
227 lymphotropic and has replication phases in salivary tissue that result in viral transmission following  
228 social or antagonistic contact (Willett and Hosie, 2013), though here we show that infection in primary  
229 PBMC is highly restricted (Fig. 2). Consequently, enhanced enFeLV transcription and basal miRNA  
230 production in these tissues may represent a specific host restriction mechanism.

231 Conversely, higher basal expression of enFeLV in lymphoid tissues may result in a greater  
232 potential for ERV-XRV recombination to occur in these cells following co-packaging of endogenous and  
233 exogenous transcripts (Stuhlmann and Berg, 1992). Recombination between enFeLV and exFeLV occurs  
234 in the 3' half of the genome in approximately 50% of progressive infections, and is associated with worse  
235 clinical outcomes, presumably relating to changes in viral receptor and cell tropism from THTR-1 to PIT-  
236 1 (Chiu et al., 2018).

237 We identified a sizable number short non-coding miRNA transcripts that map to enFeLV  
238 sequences. Unlike enFeLV transcription, enFeLV miRNA was present only at specific loci (Fig. 7; Fig. S1),  
239 suggesting a specific miRNA function. Given known function of miRNA to degrade complementary mRNA  
240 via RISC complex degradation, it seems feasible that these loci represent evolutionarily selected  
241 transcript sites that provide host defense against virulent FeLV disease. All 27 cats evaluated were  
242 positive for a 21-nt negative-sense miRNA transcript that mapped 3 nucleotides downstream from the 5'-  
243 LTR U3 region. The length of 21-nt is indicative of a transcript that functions as an siRNA via an RNAi  
244 mechanism as the DICER complex requires a very specific length of RNA (Denli et al., 2004). Mapping this  
245 21-nt sequence to exogenous FeLV demonstrates that 2 or 3 SNPs occur at the 5' end, which may impact  
246 RNAi functionality. Additional evaluation of this specific miRNA and its role in FeLV infection is  
247 warranted to assess the capacity of this miRNA to interfere with FeLV infection.

248 Therefore, one potential explanation for regressive versus progressive FeLV outcomes is as  
249 follows:

- 250 1. High levels of lymphoid enFeLV-LTR and miRNA transcription pre-empt FeLV infection of  
251 PBMC via RNAi-like mechanisms. If miRNA inhibition persists, regression may occur,  
252 concurrent with adaptive immune responses that overcome infection.
- 253 2. In individuals with lower basal LTR transcription levels (correlating with lower enFeLV-LTR  
254 proviral copy number), siRNA restriction mechanisms may fail, resulting in primary infection  
255 of lymphoid cells and progressive infection.
- 256 3. In other individuals, infection of non-lymphoid tissues with low basal levels of LTR  
257 transcription followed by recombination with enFeLV-*env* transcripts may result in XRV-ERV  
258 recombinants with enhanced tropism for PBMC. This could result in secondary PBMC infection  
259 that potentially overwhelms RNA restriction (again correlating with lower enFeLV-LTR  
260 proviral copy number), resulting in progressive infection.

261 It is likely that these mechanisms operate in conjunction with other more well-understood innate and  
262 adaptive antiviral mechanisms to drive FeLV infection outcomes in natural systems.

263 Subsets of individual animals had predominately positive-sense miRNA that aligned to sites in  
264 other FeLV *gag*, *pol*, and *env* genes (Fig. 7; Fig. S1). While positive-sense RNA can be directly used as  
265 templates for transcription, positive-sense small RNA is unlikely to do so. Mapped miRNA reads to *gag*  
266 and *env* were highly specific to single loci. The size of these specific miRNA is shorter than the RNA  
267 recognized RNAi mechanisms require (*gag* – 14nt; *env* – 12nt) and are thus unlikely to participate in RNA  
268 silencing using mechanisms that are currently defined. On the other hand, the negative-sense 21nt LTR  
269 RNA is complementary to the FeLV sequence and therefore, may serve as the template for FeLV RNA  
270 genomes being produced during infection. Furthermore, the scale of the read coverage at the LTR locus  
271 compared to the other small RNAs may indicate its biological importance and give us insight into its  
272 relative activity. The diffuse miRNA mapping pattern in *pol* may indicate that this transcript may act to  
273 silence a broad range of retroviruses with conserved sequences in this region.

274 It is possible that *gag*, *pol*, and *env* transcripts measured are translated into proteins that  
275 contribute to normal biology and physiology as they do in other ERV systems (Johnson, 2019). In 1994,  
276 McDougall et al reported that truncated enFeLV Env may participate in direct receptor interference  
277 inhibiting exogenous FeLV infection (McDougall et al., 1994). However, retroviral LTRs are not a protein-  
278 encoding regions; rather LTRs harbor both promoter and enhancer regions that induce transcription and  
279 read-through fusion transcripts that may be processed into functional proteins or other units (Berry et  
280 al., 1988). As such, enFeLV-LTR may potentially drive *cis*- or *trans*-activation of host transcription  
281 machinery to encode for anti-viral proteins, a process documented in MuLV that relates to ERV-XRV  
282 interference (Sanville et al., 2010). This phenomenon has been documented for specific host genes that  
283 propagate and inhibit disease processes depending on integration site, including anti-viral proteins such  
284 as APOBEC3C (Löwer, 1999; Sanville et al., 2010). If enFeLV-LTRs integrate near anti-viral restriction  
285 factors, it could ostensibly prime cells to be more resistant to viral infection. Solo-LTRs formed following  
286 ERV retro-transposition may result in fixation of these loci in sites where transcription provides a  
287 survival advantage through positive genetic selective. Examination of LTR integration sites in future  
288 studies may prove useful in determining what host genes may be impacted by increased transcription or  
289 expression.

290 We noted the interesting phenomenon of relatively higher enFeLV transcription in embryonic  
291 tissues (Figures 3, 4). Embryonic ERV transcription has been documented to participate in many normal  
292 biological functions. ERV transcription has been inferred as a possible protection mechanism against  
293 embryonic viral infections by stimulating innate immunity mechanisms (Grow et al., 2015). ERV  
294 expression has also been shown to be important in placentation through syncytins (a syncytium-forming  
295 protein responsible for trophoblast invasion of the uterine wall) (Lavialle et al., 2013). During embryonic  
296 development of the thymus, host genes (and by consequence, ERVs) are expressed and recognized by the  
297 autoimmune regulator (AIRE) so as not to elicit an autoimmune response against 'self' proteins

298 (Crittenden et al., 1987). This may allow XRV evade specific adaptive immune responses. Ultimately,  
299 discovery of the higher transcription may signal cooption of enFeLV proteins in biological processes.

300 Transcripts from tiger and bobcat were identified that aligned to the enFeLV genome. One mRNA  
301 location in the LTR mapped to a 30-nt poly-A stretch in the 5'-LTR (Fig. 5). *Felis catus* samples did not  
302 contain transcripts mapping to this region. A second 90-nt mRNA mapped to nucleotide 5,392-5,488 of  
303 *pol* and shares identity to both enFeLV and another endogenous gammaretroviral element described in  
304 domestic cats as feline endogenous retrovirus gamma4-A1 (Kawasaki et al., 2017). This 90-nt *pol*  
305 endonuclease/integrase region transcript likely represents an ancient conserved motif of retroviral *pol*  
306 from an ERV remnant that arose in Felidae prior to divergence between large and small felids. This  
307 transcript may represent a *pol* remnant from an ancient endogenized retrovirus with homology to FeLV.  
308 The associated LTR segment from this ERV may drive transcription via promotor or enhancer function  
309 (Berry et al., 1988). The fact that no other related enFeLV segments were recovered from tiger and  
310 bobcat datasets suggests this fragment represents a highly conserved region of *pol* that is  
311 transcriptionally active. Future studies to identify additional segments of this ERV may reveal a more  
312 ancient ERV than FeLV that spans most Felid species.

313 SRA datasets were highly valuable for this analysis, but curation of datasets was noted to be highly  
314 variable. Lack of description and quality control required us to discard more than 80% of the 207  
315 datasets initially identified. Further, our inquiry has demonstrated that data from non-traditional animal  
316 models that provides highly informative comparative data are sorely lacking from genomic databases.  
317 For example, the inquiry "HIV RNA-seq" yields 1,491 results as of June 2020, whereas "FIV RNA-seq"  
318 yielded only 8 responses. The capacity of comparative genomics studies would be greatly expanded by  
319 encouraging analyses that will complement the human datasets available.

320 FeLV represents a naturally occurring retroviral infection of an outbred species with very well  
321 documented clinical and virological outcomes. Here we present compelling evidence that enFeLV-LTR  
322 transcripts in feline lymphoid tissue abrogate exogenous FeLV infections. Additional experiments

documenting mechanistic aspects of this system in relation to observed natural disease outcomes  
represents a significant opportunity to understand function of ERV in mitigating viral infections, and to  
understand mammalian RNA interference mechanisms, impacts of ERV on host evolution, and LTR  
enhancer and promoter functions that regulate host innate and adaptive immune responses.

## **Materials and Methods**

### Peripheral blood mononuclear cell infection

Blood was drawn from specific pathogen free domestic cats housed at Colorado State University (IACUC protocol #16-6390A). Peripheral blood mononuclear cells (PBMCs) were isolated from fresh blood by ficoll-gradient centrifugation. PBMCs were cultured in 20% FBS-supplemented RPMI media supplemented with 100 ng/mL IL-2 (Sigma, USA) and 50 ng/mL concanavalin A (Sigma, USA). Primary PBMC cultures were expanded for 2 passages before being directly infected.

PBMCs were plated at  $1 \times 10^6$  cells/mL and infected with an MOI of 0.01 FeLV-61E as was previously described (Chiu and VandeWoude, 2020). Briefly, supernatant was sampled at days 0, 1, 3, 5, and 7 and tested for viral antigen using p27 ELISA, as previously described PBMCs were harvested at day 5 to enumerate cell viability and proviral copy number. PBMC proviral and antigen load were compared to fibroblast infection proviral and antigen load conducted simultaneously and reported previously (Chiu and VandeWoude, 2020). Briefly, primary fibroblasts and control Crandell-Rees feline kidney control cells (CrFK) were plated at a density of 50,000 cells per  $2 \text{ cm}^2$  in a 24-well plate and infected with an MOI of 0.01 FeLV-61E. Supernatant was sampled at days 0, 1, 3, 5, 7, and 10 and cells were harvested at day 5 and 10 to enumerate cell viability and proviral copy number.

### Endogenous FeLV transcriptomic analysis

Domestic cat transcriptome and miRNAome data sets were acquired through the search function in the NCBI Sequence Reads Archive (SRA) using the search key words: “felis” and “rna-seq.” Datasets

348 were included in the study if they were derived from healthy cats, identified the tissue of origin, and  
349 represented transcriptome (excluding miRNAome) datasets (Table S1). Two additional non-*Felis spp* felid  
350 transcriptome datasets (*Lynx rufus*, *Panthera tigris*; Accession numbers SRR924676 and SRR6384483/  
351 SRR6384484) were included as negative controls that would not be expected to harbor enFeLV  
352 transcripts (Table S1). Tissues analyzed included embryonic (fetus, embryo body, embryo head), neural  
353 (cerebellum, parietal lobe, occipital lobe, temporal lobe, hippocampus, spinal cord, retina), skin (skin, ear  
354 tip, ear cartilage), lymphoid (spleen, lymph node, bone marrow, thymus), and other organ (muscle, liver,  
355 uterus, kidney, testes, pancreas, heart, salivary gland) tissues. All data processing and analysis was  
356 completed using the Colorado State University College of Veterinary Medicine and Biomedical Science  
357 server. Transcriptome datasets were analyzed using a custom bioinformatics pipeline (Fig. 1). Reads  
358 were trimmed for appropriate adapters and by quality (q=20) using cutadapt (version 1.18). The first  
359 600-nt and last 600-nt of the full-length enFeLV were discarded prior to creating the index due to the  
360 potential for transcripts to map to other host genomic elements that surrounded the enFeLV integration  
361 site. Indices were first generated for full-length domestic cat enFeLV (Accession Number: AY364319) and  
362 individual enFeLV gene regions, including LTR, *gag*, *pol*, and *env* separately using Bowtie2-build function  
363 (version 2.3.4.1). Transcriptome sequences were mapped to indices using "--sensitive" settings in local  
364 mode in Bowtie2 to allow for heterogeneity among different enFeLV genotypes. Alignments were visually  
365 inspected by importing mapped .sam files into Geneious 11.1.2. Exogenous FeLV was ruled out as the  
366 source of mapped reads by looking for exogenous FeLV-specific DNA segments. Any transcripts mapped  
367 to the negative controls were manually inspected and their identities confirmed using NCBI's BLAST  
368 tblastn function. Transcriptome reads mapping to full-length FeLV were reported as reads per million  
369 reads (RPM). While the reads were mapped as paired-end reads, reported RPM was calculated as  
370 unpaired reads. Individual genome elements were reported as fragments per kilobase million (FPKM) to  
371 normalize for size of the respective gene region (full-length enFeLV- 8,448nt; LTR - 592nt; *gag* - 1,512nt;  
372 *pol* - 3,630nt; *env* - 2002nt). Percent transcription for full-length FeLV was analyzed by ANOVA in Prism

(version 7.0). Custom scripts are available at <https://github.com/VandeWoude-Laboratory/Florida-panther-virus>.

### Feline miRNAome analysis

miRNAome datasets were accessed as described above and by querying “felis” and “rna-seq” that also identified miRNA-Seq in the library preparation strategy (Fig. 1). Tissues analyzed included neural (cerebellum, cerebral cortex, brain stem), skin (skin, lip, tongue), lymphoid (spleen, lymph node), and various organ (pancreas, kidney, liver, lung, testis, ovary) tissues. Using the full-length enFeLV index described above constructed with Bowtie2-build, miRNAome reads were mapped on local mode with a minimum threshold score set at 20 in Bowtie2 to account for miRNA’s intrinsically short length. miRNA reads mapping to full-length enFeLV were reported as percent reads mapped to each genome element compared to total mapped reads to the full-length FeLV genome. Percent miRNA mapped to enFeLV was analyzed by ANOVA in Prism (version 7.0). Custom scripts are available at <https://github.com/VandeWoude-Laboratory/Florida-panther-virus>.

miRNAome datasets were visualized in strand-specific orientation using sRNAPipe on the Galaxy platform (R. et al., 2018). Default settings were used though three genome mismatches were allowed to accommodate identified SNPs at the 3’-end of a 21-nt LTR siRNA sequence. miRNA was mapped against the enFeLV genome (AY364319), with LTR signifying the only transmissible element input file, and protein encoding genes as the transcripts and mRNA input files. All 27 datasets were analyzed to determine positive and negative strand miRNAs of a minimum of 18-nt in length. A second separate negative-sense analysis was conducted that excluded a highly transcribed 21-nt LTR siRNA in all datasets so that less abundant transcripts could be readily visualized.

### **Acknowledgements**

This work was supported by National Science Foundation–Ecology of Infectious Diseases award 1413925 and



398 by the Office of the Director of the National Institutes of Health under awards T32OD012201 and  
399 F30OD023386. The content is solely the responsibility of the authors and does not necessarily represent the  
400 official views of the National Institutes of Health. The funders had no role in study design, data collection and  
401 interpretation, or the decision to submit the work for publication. We would like to thank Matthew Moxcey and  
402 Tyler Eike for their IT assistance.

403

#### 404 **Declaration of Interests**

405 The authors declare no competing interests.

**Figure 1. Bioinformatics pipeline used in this analysis.** We identified 207 RNA-seq datasets during initial searches. Filtering for healthy cats with defined tissue of origin resulted in 56 datasets for our transcriptome analysis and 27 datasets for our miRNAome analysis. Out of 56 transcriptome datasets, only 33 satisfied quality controls allowing final analysis. Two non-*Felis* spp. transcriptome datasets were included as negative controls.

**Figure 2. Domestic cat PBMCs were more resistant to FeLV infection than fibroblasts.** A) At day 5, median proviral load was 6,359 copies per  $10^6$  cells in PBMCs, compared to 119,155 copies per  $10^6$  cells in fibroblasts (Mann-Whitney U test;  $**=p<0.01$ ). B) Domestic cat PBMCs supported low levels of virus replication measured by p27 antigen ELISA. Only two PBMC cultures had transient infections that peaked above the negative cutoff value, established at 3x standard error above average value for negative control replicates (red line). CrFK infections (dotted) were performed as a positive control.

**Figure 3. enFeLV transcription is tissues and gene specific.** A) enFeLV reads are transcribed at greatest levels in lymphoid and salivary gland tissues. Reads per million (RPM) is a measure of comparison to all other available transcripts in the transcriptome dataset. B) enFeLV-LTR is transcribed at greater levels than other enFeLV genes. Multiple comparisons following ANOVA demonstrated an average 10-fold increase in enFeLV-LTR compared to *gag* ( $p=0.0079$ ), *pol* ( $p=0.0073$ ), and *env* ( $p=0.0111$ ). FPKM = fragments per kilobase million, a measure of total RNA normalized by gene fragment length. Data shown here represent accession numbers SRX211594-211596; SRX211644-211646; SRX211688-211690; SRX1610301-1610326; SRX1625943-1625949. Red data points represent negative control datasets (*P. tigris altaica* – SRX317246; *L. rufus* – SRR6384483).

**Figure 4. enFeLV genome elements are transcribed variably between all tissue types.** A) enFeLV-LTR is transcribed 10 times greater than *gag* (B), *pol* (C), and *env* (D). Lymphoid tissues and the salivary

431 gland (boxed) harbor the greatest amount of enFeLV transcripts across all genome elements. Grey dotted  
432 line at 0.1 FPKM are provided for ease of interpreting difference in scale. Data shown here represent  
433 accession numbers SRX211594-211596; SRX211644-211646; SRX211688-211690; SRX1610301-  
434 1610326; SRX1625943-1625949. Red data points represent negative control datasets (*P. tigris altaica* –  
435 SRX317246; *L. rufus* – SRR6384483).

436  
437 **Figure 5. enFeLV genome elements are found in bobcat (SRA Accession number SRR6384483) and**  
438 **Siberian tiger (SRA Accession number SRX317246) transcriptomes.** RNA mapped to a poly-A region  
439 of the LTR (nt 275-304) and a variable region in *pol* (nt 5,421-5,608). The poly-A region only skewed  
440 negative control datasets and did not have an impact on *Felis catus* transcriptome analysis following  
441 visual verification. The *pol* mapped reads represented a conserved region that appears to map to an  
442 uncharacterized feline endogenous retrovirus that may be distantly related to enFeLV and is found in  
443 both the bobcat and Siberian tiger. The sequences highlighted in green were responsible for driving  
444 alignment to enFeLV *pol*. Nucleotides highlighted in red represent SNPs.

445  
446 **Figure 6. miRNA could be detected for all gene regions in enFeLV but mapped most frequently to**  
447 **enFeLV-LTR (ANOVA;  $p < 0.001$ ).** The contribution of miRNA attributed to *gag*, *pol*, or *env* rarely  
448 exceeded 0.01 fragments per kilobase million (FPKM). Relative expression was not different among the  
449 three genes with background expression proportional to the size of the gene. Increased LTR expression  
450 may be driven by both the increased number of LTRs that exist within the genome relative to the other  
451 genes and the increased activity of the LTR. Data shown here represent accession numbers SRR4243109-  
452 4243135.

453  
454 **Figure 7. enFeLV miRNA maps to four regions of the enFeLV genome.** A) Twenty-seven unique  
455 miRNA datasets were evaluated for reads mapping to LTR, *gag*, *pol*, and *env* genome segments. Segments

456 that represented greater than 10% of total mapped reads occurred in 27, 6, 3, and 6 datasets,  
457 respectively. Locations of these transcripts are indicated below the genome map, and sequences for these  
458 transcripts in LTR (identified in all 27 datasets), *gag* (identified in 6 of 27 datasets) and *env* (identified in  
459 6 of 27 datasets) are indicated. Multiple heterogenous miRNA were identified in 3 of 27 datasets, perhaps  
460 indicating contributions from various closely related endogenous retroviruses. B-J) Positive and negative  
461 miRNAs identified in three representative datasets are displayed to illustrate individual cat variation in  
462 enFeLV miRNA distribution and polarity. Accession number SRR4243132 is represented in Panels B, E, H;  
463 Accession number SRR4243126 is represented in Panels C, F, I; Accession number SRR4243130 is  
464 represented in Panels D, G, J. Top row (panels B, C, D) indicates positive strand transcript and scaled  
465 reads across the enFeLV genome [schematic below the top row indicates enFeLV genome map correlating  
466 to map shown in (A)]. Difference in Y axis illustrates variation in scaled read depth from one dataset to  
467 another. Panel D illustrates a high abundance transcript that maps to enFeLV *env* in one dataset. Middle  
468 row (panels E, F, G) indicates scaled read depth of negative strand miRNA transcripts. The overwhelming  
469 abundance of a 21-nt LTR transcript ( $2 \cdot 5 \times 10^5$  scaled reads/dataset) obscures lower abundance negative  
470 strand transcripts. Removal of this transcript from panels H, I, J allows visualization of lower abundance  
471 negative strand miRNAs (5-35,000 scaled reads/dataset) that map to enFeLV.

472

473 **Figure S1. enFeLV miRNA maps to the enFeLV genome in the 27 datasets.** Each column of three  
474 represent the data from one miRNAome dataset not displayed in Fig. 7 (Accession numbers SRR4243109-  
475 4243125; 4243127-4243129; 4243131; 4243133-35). Top rows (blue; panels A, B, C, J, K, L) indicates  
476 positive strand transcript and scaled reads across the enFeLV genome [schematic below the top row  
477 indicates enFeLV genome map correlating to map shown in (A)]. Difference in Y axis illustrates variation  
478 in scaled read depth from one dataset to another. Middle rows (red; panels D, E, F, M, N, O) indicates  
479 scaled read depth of negative strand miRNA transcripts. The overwhelming abundance of a 21-nt LTR  
480 transcript ( $2 \cdot 5 \times 10^5$  scaled reads/dataset) obscures lower abundance negative strand transcripts.

481 Removal of this transcript from panels G, H, I, P, Q, R allows visualization of lower abundance negative  
482 strand miRNAs that map to enFeLV.

- 483 Balasubramaniam, M., Pandhare, J., and Dash, C. (2018). Are microRNAs Important Players in HIV-1  
484 Infection? An Update. *Viruses* 10.
- 485 Bandecchi, P., Matteucci, D., Baldinotti, F., Guidi, G., Abramo, F., Tozzini, F., and Bendinelli, M. (1992).  
486 Prevalence of feline immunodeficiency virus and other retroviral infections in sick cats in Italy. *Vet*  
487 *Immunol Immunopathol* 31, 337-345.
- 488 Berry, B.T., Ghosh, A.K., Kumar, D.V., Spodick, D.A., and Roy-Burman, P. (1988). Structure and function of  
489 endogenous feline leukemia virus long terminal repeats and adjoining regions. *J Virol* 62, 3631-3641.
- 490 Boeke, J.D., and Stoye, J.P. (1997). Retrotransposons, endogenous retroviruses, and the evolution of  
491 retroelements. In *Retroviruses*, J.M. Coffin, S.H. Hughes, and H.E. Varmus, eds. (Cold Spring Harbor (NY):  
492 Cold Spring Harbor Laboratory Press), pp. 343-346.
- 493 Chiu, E.S., Hoover, E.A., and VandeWoude, S. (2018). A retrospective examination of feline leukemia  
494 subgroup characterization: viral interference assays to deep sequencing. *Viruses* 10,  
495 doi:10.3390/v10010029.
- 496 Chiu, E.S., and VandeWoude, S. (2020). Presence of endogenous viral elements negatively correlates with  
497 feline leukemia virus susceptibility in puma and domestic cat cells. *J Virol* 94, e01274-01220.
- 498 Consortium, I.H.G.S. (2001). Initial sequencing and analysis of the human genome. *Nature* 409, 860-921.
- 499 Cotter, S.M., Hardy, W.D., Jr., and Essex, M. (1975). Association of feline leukemia virus with  
500 lymphosarcoma and other disorders in the cat. *Journal of American Veterinary Medical Association* 166,  
501 449-454.
- 502 Crittenden, L.B., McMahon, S., Halpern, M.S., and Fadly, A.M. (1987). Embryonic infection with the  
503 endogenous avian leukosis virus Rous-associated virus-0 alters responses to exogenous avian leukosis  
504 virus infection. *J Virol* 61, 722-725.
- 505 Denli, A., BBJ, T., RHA, P., RF, K., and GJ, H. (2004). Processing of primary microRNAs by the  
506 Microprocessor complex. *Nature* 432, 231-235.
- 507 Fushan, A.A., Turanov, A.A., Lee, S.-G., Kim, E.B., Lobanov, A.V., Yim, S.H., Buffenstein, R., Lee, S.-R., Chang,  
508 K.-T., Rhee, H., *et al.* (2015). Gene expression defines natural changes in mammalian lifespan. *Aging Cell*  
509 14, 352-365.
- 510 Ge, Q., McManus, M.T., Nguyen, T., Shen, C.-H., Sharp, P.A., Eisen, H.N., and Chen, J. (2003). RNA  
511 interference of influenza virus production by directly targeting mRNA for degradation and indirectly  
512 inhibiting all viral RNA transcription. *PNAS* 100, 2718-2723.
- 513 Gleich, S.E., Krieger, S., and Hartmann, K. (2009). Prevalence of feline immunodeficiency virus and feline  
514 leukaemia virus among client-owned cats and risk factors for infection in Germany. *J Feline Med Surg* 11,  
515 985-992.
- 516 Griffiths, D.J. (2001). Endogenous retroviruses in the human genome sequence. *Genome Biology* 2,  
517 1017.1011-1017.1015.
- 518 Grow, E.J., Flynn, R.A., Chavez, S.L., Bayless, N.L., Wossidlo, M., Wesche, D.J., Martin, L., Ware, C.B., Blish,  
519 C.A., Chang, H.Y., *et al.* (2015). Intrinsic retroviral reactivation in human preimplantation embryos and  
520 pluripotent cells. *Nature* 522, 221-225.
- 521 Hartmann, K. (2011). Clinical aspects of feline immunodeficiency and feline leukemia virus infection. *Vet*  
522 *Immunol Immunopathol* 143, 190-201.
- 523 Holt, M.P., Shevach, E.M., and Punkosdy, G.A. (2013). Endogenous mouse mammary tumor viruses (mtv):  
524 new roles for an old virus in cancer, infection, and immunity. *Front Oncol* 3, 287.
- 525 Johnson, W.E. (2019). Origins and evolutionary consequences of ancient endogenous retroviruses. *Nat*  
526 *Rev Microbiol.*
- 527 Kawasaki, J., Kawamura, M., Ohsato, Y., Ito, J., and Nishigaki, K. (2017). Presence of a Shared 5'-Leader  
528 Sequence in Ancestral Human and Mammalian Retroviruses and Its Transduction into Feline Leukemia  
529 Virus. *J Virol* 91.
- 530 Knerr, I., Huppertz, B., Weigel, C., Dotsch, J., Wich, C., Schild, R.L., Beckmann, M.W., and Rascher, W. (2004).  
531 Endogenous retroviral syncytin: compilation of experimental research on syncytin and its possible role in  
532 normal and disturbed human placentogenesis. *Mol Hum Reprod* 10, 581-588.

- 533 Kusov, Y., Kanda, T., Palmenberg, A., Sgro, J.Y., and Gauss-Muller, V. (2006). Silencing of hepatitis A virus  
534 infection by small interfering RNAs. *J Virol* 80, 5599-5610.
- 535 Lagana, A., Dirksen, W.P., Supsavhad, W., Yilmaz, A.S., Ozer, H.G., Feller, J.D., Vala, K.A., Croce, C.M., and  
536 Rosol, T.J. (2017). Discovery and characterization of the feline miRNAome. *Sci Rep* 7, 9263.
- 537 Lam, J.K., Chow, M.Y., Zhang, Y., and Leung, S.W. (2015). siRNA Versus miRNA as Therapeutics for Gene  
538 Silencing. *Mol Ther Nucleic Acids* 4, e252.
- 539 Lavalie, C., Cornelis, G., Dupressoir, A., Esnault, C., Heidmann, O., Vernochet, C., and Heidmann, T. (2013).  
540 Paleovirology of 'syncytins', retroviral env genes exapted for a role in placentation. *Philos Trans R Soc  
541 Lond B Biol Sci* 368, 20120507.
- 542 Li, F., and Karlsson, H. (2016). Expression and regulation of human endogenous retrovirus W elements.  
543 *APMIS* 124, 52-66.
- 544 Lober, U., Hobbs, M., Dayaram, A., Tsangaras, K., Jones, K., Alquezar-Planas, D.E., Ishida, Y., Meers, J.,  
545 Mayer, J., Quedenau, C., *et al.* (2018). Degradation and remobilization of endogenous retroviruses by  
546 recombination during the earliest stages of a germ-line invasion. *Proc Natl Acad Sci U S A*.
- 547 Löwer, R. (1999). The pathogenic potential of endogenous retroviruses: facts and fantasies. *Trends in  
548 Microbiology* 7, 350-356.
- 549 Malfavon-Borja, R., Feschotte, C., and Sullivan, C.S. (2015). Fighting Fire with Fire: Endogenous Retrovirus  
550 Envelopes as Restriction Factors. *J Virol* 89, 4047-4050.
- 551 McDougall, A.S., Terry, A., Tzavaras, T., Cheney, C., Rojko, J., and Neil, J.C. (1994). Defective endogenous  
552 proviruses are expressed in feline lymphoid cells: evidence for a role in natural resistance to subgroup B  
553 feline leukemia viruses. *J Virol* 68, 2151-2160.
- 554 Muirden, A. (2002). Prevalence of feline leukaemia virus and antibodies to feline immunodeficiency virus  
555 and feline coronavirus in stray cats sent to an RSPCA hospital. *Vet Rec* 150, 621-625.
- 556 Ozata, D.M., Gainetdinov, I., Zoch, A., O'Carroll, D., and Zamore, P.D. (2019). PIWI-interacting RNAs: small  
557 RNAs with big functions. *Nat Rev Genet* 20, 89-108.
- 558 Polani, S., Roca, A.L., Rosensteel, B.B., Kolokotronis, S.O., and Bar-Gal, G.K. (2010). Evolutionary dynamics  
559 of endogenous feline leukemia virus proliferation among species of the domestic cat lineage. *Virology*  
560 405, 397-407.
- 561 Powers, J.A., Chiu, E.S., Kraberger, S.J., Roelke-Parker, M., Lowery, I., Erbeck, K., Troyer, R., Carver, S., and  
562 VandeWoude, S. (2018). Feline leukemia virus disease outcomes in a domestic cat breeding colony:  
563 Relationship to endogenous FeLV and other chronic viral infections. *J Virol*.
- 564 Pratt, A.J., and MacRae, I.J. (2009). The RNA-induced silencing complex: a versatile gene-silencing  
565 machine. *J Biol Chem* 284, 17897-17901.
- 566 R., P., Vaury, C., Pouchin, P., Jensen, S., and Brasslet, E. (2018). sRNAPippe: a Galaxy-based pipeline for  
567 bioinformatic in-depth exploration of small RNAseq data. *Mobile DNA* 9.
- 568 Roca, A.L., Nash, W.G., Menninger, J.C., Murphy, W.J., and O'Brien, S.J. (2005). Insertional polymorphisms  
569 of endogenous feline leukemia viruses. *J Virol* 79, 3979-3986.
- 570 Sanville, B., Dolan, M.A., Wollenberg, K., Yan, Y., Martin, C., Yeung, M.L., Strebel, K., Buckler-White, A., and  
571 Kozak, C.A. (2010). Adaptive evolution of Mus Apobec3 includes retroviral insertion and positive  
572 selection at two clusters of residues flanking the substrate groove. *PLoS pathogens* 6, e1000974.
- 573 Schuster, S., Miesen, P., and van Rij, R.P. (2019). Antiviral RNAi in Insects and Mammals: Parallels and  
574 Differences. *Viruses* 11.
- 575 Spencer, T.E., Mura, M., Gray, C.A., Griebel, P.J., and Palmarini, M. (2003). Receptor Usage and Fetal  
576 Expression of Ovine Endogenous Betaretroviruses: Implications for Coevolution of Endogenous and  
577 Exogenous Retroviruses. *J Virol* 77, 749-753.
- 578 Stuhlmann, H., and Berg, P. (1992). Homologous recombination of copackaged retrovirus RNAs during  
579 reverse transcription. *J Virol* 66, 2378-2388.
- 580 Torres, A.N., Mathiason, C.K., and Hoover, E.A. (2005). Re-examination of feline leukemia virus: host  
581 relationships using real-time PCR. *Virology* 332, 272-283.

- 582 Umemura, M., Wajjwalku, W., Upragarin, N., Liu, T., Nishimura, H., Matsuguchi, T., Nishiyama, Y., Wilson,  
583 G.M., and Yoshikai, Y. (2000). Expression of Mouse Mammary Tumor Virus Superantigen Accelerates  
584 Tumorigenicity of Myeloma Cells. *J Virol* 74, 8226-8233.
- 585 Wei, L., Wu, X., Zhu, L., and Jiang, Z. (2011). Mitogenomic analysis of the genus *Panthera*. *Science China*  
586 *Life Sciences* 54, 917-930.
- 587 Willett, B.J., and Hosie, M.J. (2013). Feline leukaemia virus: half a century since its discovery. *Vet J* 195, 16-  
588 23.
- 589 Yilmaz, H., and Ilgaz, A. (2000). Prevalence of FIV and FeLV infections in cats in Istanbul. *J Feline Med*  
590 *Surg* 2, 69-70.
- 591 Yu, T., Koppetsch, B.S., Pagliarani, S., Johnston, S., Silverstein, N.J., Luban, J., Chappell, K., Weng, Z., and  
592 Theurkauf, W.E. (2019). The piRNA Response to Retroviral Invasion of the Koala Genome. *Cell* 179, 632-  
593 643 e612.
- 594 Zeng, M., Hu, Z., Shi, X., Li, X., Zhan, X., Li, X.-D., Wang, J., Choi, J.H., Wang, K.-W., Purrington, T., *et al.* (2014).  
595 MAVS, cGAS, and endogenous retroviruses in T-independent B cell responses. *Science* 346, 1486-1492.
- 596



**NCBI's  
Sequence  
Read  
Archive**

**Search terms:  
'Felis'  
'RNA-Seq'**

**207 transcriptomic  
RNA-Seq datasets**

**Filtered by:  
-Healthy cats  
-Tissue specified**

**85 datasets**

**56 transcriptome  
datasets**

**27 miRNAome  
datasets**

**Trimmed by:  
1) Quality (Q=20)  
2) Universal  
Illumina Adapters**

**Cutadapt (version 1.18)**

**Trimmed by:  
1) Quality (Q=20)**

**42 transcriptome datasets and  
2 non-*Felis* spp. negative controls**

**Align to enFeLV  
-LTR, -gag, -pol,  
and -env, and  
full-length enFeLV  
indices**

**Bowtie2  
(version 2.3.4.1)**

**Align to enFeLV  
-LTR, -gag, -pol,  
and -env, and  
full-length enFeLV  
indices**

**-local mode**

**-local mode  
--min-score 20**

**Mapped reads visually verified in Geneious (version 11.1.2)**

A.

Log proviral copies/ $10^6$  cells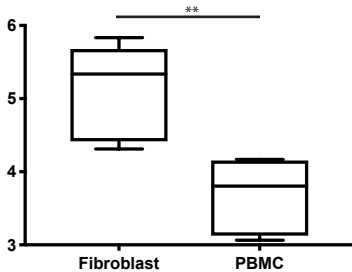

B.

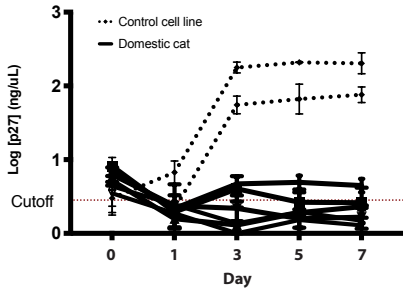



**A**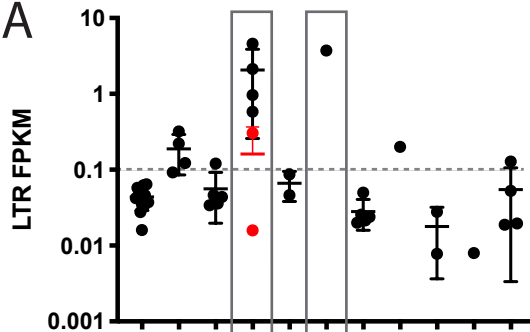**C**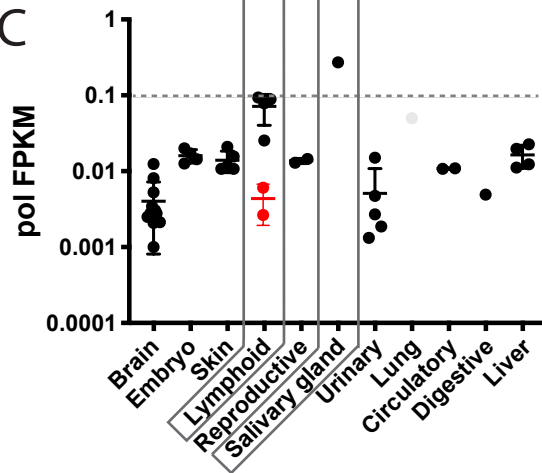**B**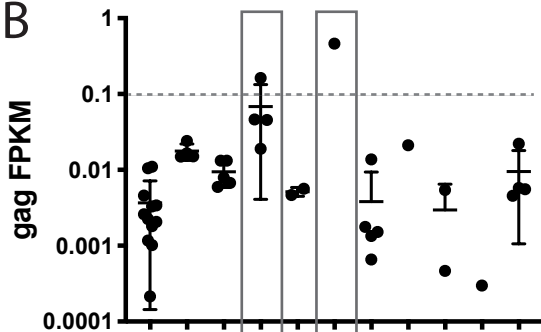**D**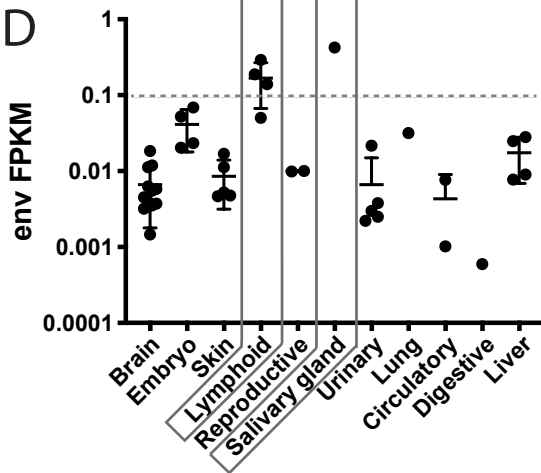

# enFeLV genome

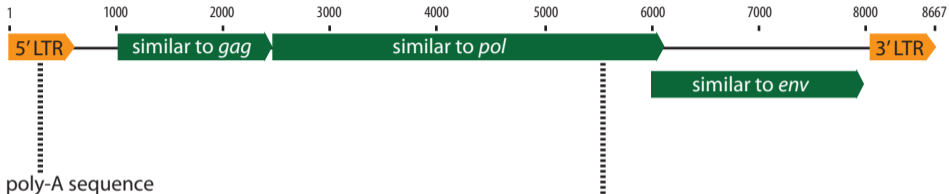

| Accession number | Species                        | Genome position | Sequence                                                                                                                                                                                           |
|------------------|--------------------------------|-----------------|----------------------------------------------------------------------------------------------------------------------------------------------------------------------------------------------------|
| SRX317246        | <i>Panthera tigris altaica</i> | 5421-5608       | ATGATAGGGTCAGACAATGGACCTGCATTCGTCTCTAAGGTAAGTCAGGAAC TGGCTTCCATAC<br>TTGGGGCTGATTGGAAATTACATTGTGCATACCGACCCCAAAGCTCAGGACAGGTAGAGAGA<br>ATGAACAGAACATTAAGGAGACCCTAACCAAATTGACCATGGAGACTGGCGTTAATTGG |
| SRR6384483       | <i>Lynx rufus</i>              | 5427-5608       | GGGTCAGACAATGGACCTGCATTCGTCTCTAAGGTAAGTCAGGAAC TGGCTGCCATACTTGGG<br>GCTGATTGGAAATTACATTGTGCATACCGACCCCAAAGCTCAGGACAGGCAGAGAGAATGAACA<br>GAGCATTAAAGGAGACCCTAACCAAATTGACCATGGAGACTGGCGCTAATTG       |

Fragments per kilobase million

miRNA

\*\*\*

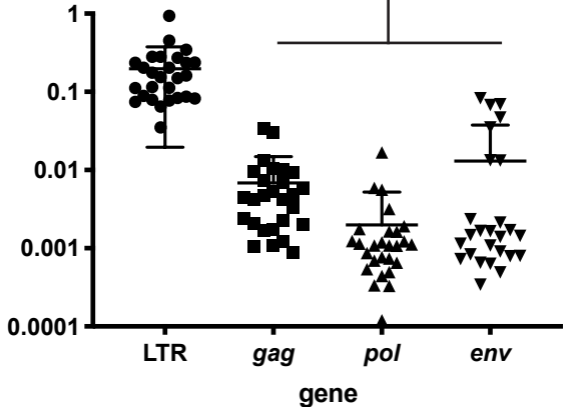

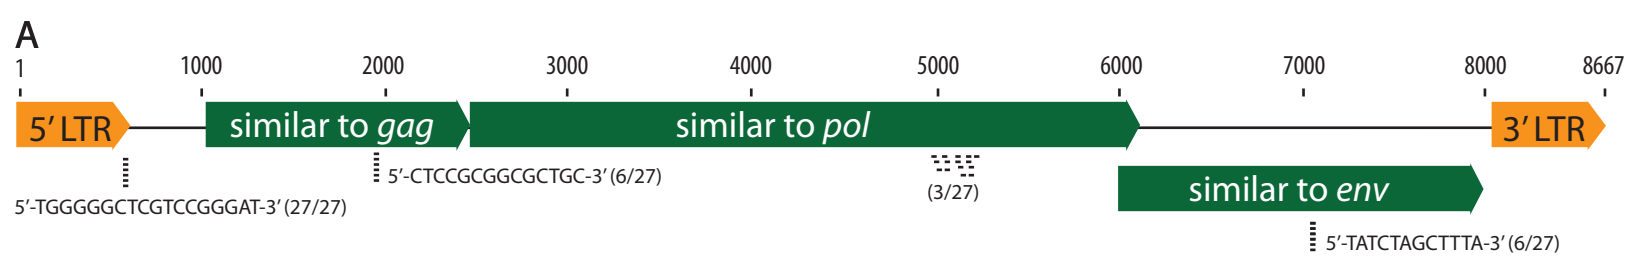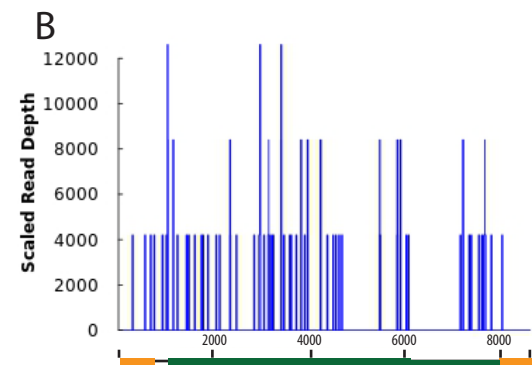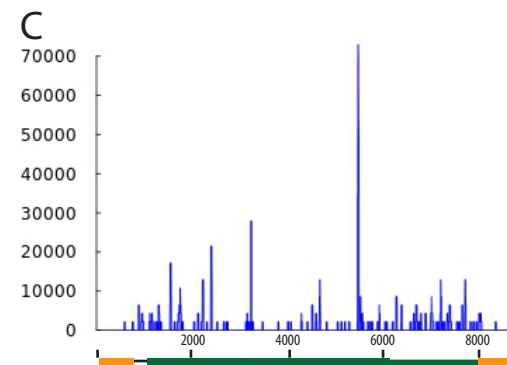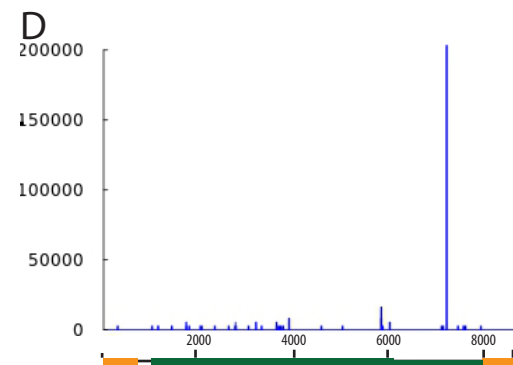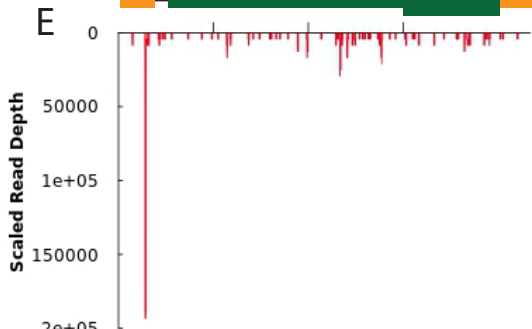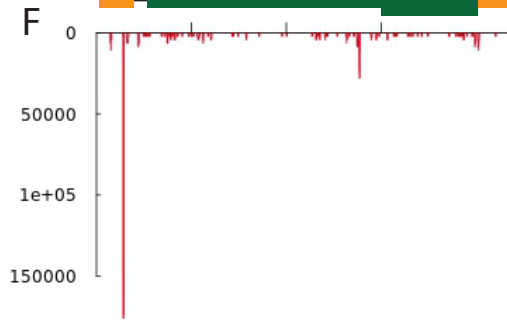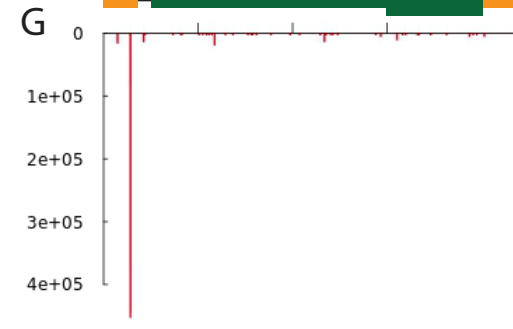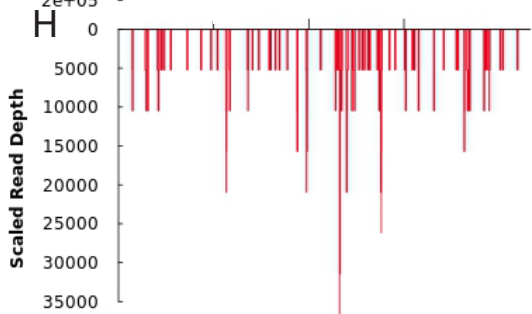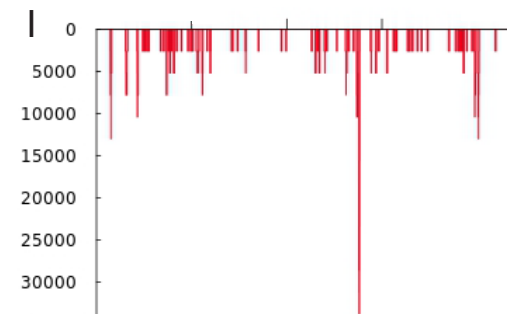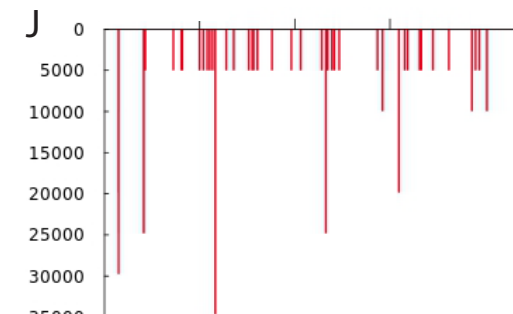

Source: https://www.biorxiv.org/content/10.1101/2021.01.12.426481v1.full.pdf
